# Supplementary material
Source: MDPI journal article supplement (https://www.mdpi.com/2073-4441/14/15/2445)
Supplement: s1 [file s1]

# **Supporting Information for**

## **“Sea Anemone”-like CeFe Oxides for High-efficient Phosphate Removal**

Xiaoying Tan <sup>1</sup>, Pingping Dong <sup>1</sup>, Hongping Min <sup>2</sup>, Jinxue Luo <sup>2</sup>, Wenhai Huang <sup>2</sup>, Xiaodong

Wang <sup>2</sup>, Qingqing Li <sup>1</sup> and Qile Fang <sup>1,\*</sup>

<sup>1</sup> Advanced Institute of Natural Sciences, Beijing Normal University at Zhuhai, Zhuhai 519087, P.R. China; 18127598893@163.com (X. T.), 15078110801@163.com (P. D.), liqq727@bnu.edu.cn (Q. L.)

<sup>2</sup> China Construction Third Bureau Green Industry Investment Co. LTD, Wuhan 430074, PR China; mhp22@mails.tsinghua.edu.cn (H. M.), jinxueluo@yeah.net (J. L.), neroharmless@hotmail.com (W. H.), xiaodong8514@163.com (X. W.)

\* Correspondence: fangqile@bnu.edu.cn ;

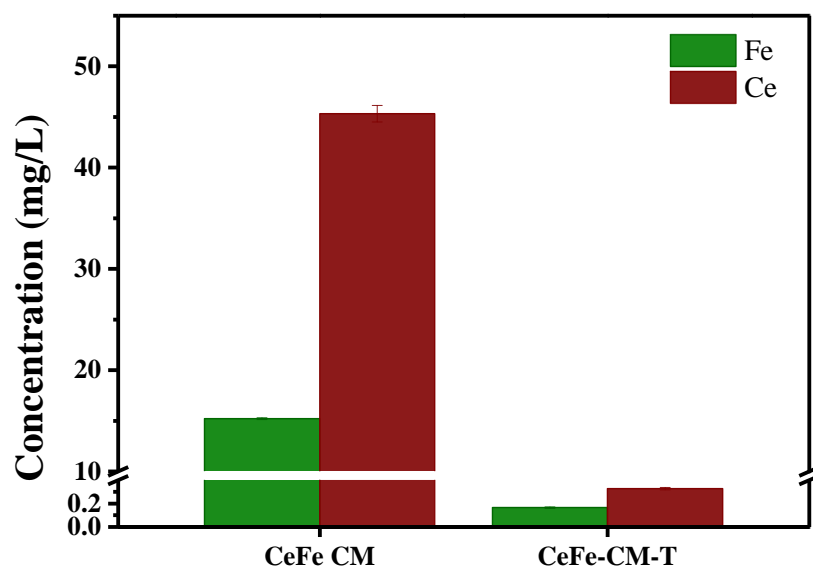

Figure S1. Ions releasing of the as-prepared CeFe based materials (CeFe-CM and CeFe-CM-T) at the same solid/aqueous rate with adsorption of 10 mg/60 mL.

**Table S1.** Langmuir and Freundlich model parameters

| Samples                        | Langmuir         |                  |       | Freundlich       |                 |       |
|--------------------------------|------------------|------------------|-------|------------------|-----------------|-------|
|                                | $Q^0$<br>(mg/g)  | $b$<br>(L/mg)    | $R^2$ | $K_f$            | $N$             | $R^2$ |
| CeFe-CM-T                      | $16.99 \pm 0.83$ | $2.90 \pm 1.10$  | 0.73  | $10.39 \pm 0.28$ | $0.16 \pm 0.01$ | 0.97  |
| CeO <sub>2</sub>               | $3.99 \pm 0.15$  | $25.32 \pm 7.47$ | 0.82  | $2.88 \pm 0.14$  | $0.14 \pm 0.02$ | 0.83  |
| Fe <sub>3</sub> O <sub>4</sub> | $0.99 \pm 0.02$  | $0.31 \pm 0.03$  | 0.97  | $0.36 \pm 0.03$  | $0.26 \pm 0.02$ | 0.91  |

The Langmuir model:  $Q = Q^0 b C_e / (1 + b C_e)$ , The Freundlich model:  $Q = K_f C_e^N$ ,  $Q$  is the amount sorbed per unit weight of sorbent, mg/g;  $C_e$  is the equilibrium concentration, mg/L;  $K_f$  [(mg/kg)/(mg/L) <sup>$N$</sup> ] is the Freundlich capacity coefficient, and  $N$  is isotherm curvature;  $Q^0$  (mg/g) is the adsorption capacity coefficient, and  $b$  (L/mg) is the adsorption rate coefficient; and  $n$  and  $R^2$  are fitting parameter.

**Table S2.** Regression parameters of the three kinetic models

| Samples                        | Pseudo-first-kinetic <sup>1)</sup> |                                                   |       | Pseudo-second-kinetic <sup>2)</sup> |                                                   |       | Elovich model <sup>3)</sup>                       |                                  |       |
|--------------------------------|------------------------------------|---------------------------------------------------|-------|-------------------------------------|---------------------------------------------------|-------|---------------------------------------------------|----------------------------------|-------|
|                                | $q_e$<br>(mg g <sup>-1</sup> )     | $K_1$<br>(h <sup>-1</sup> )                       | $R^2$ | $q_e$<br>(mg g <sup>-1</sup> )      | $K_2$<br>(mg g <sup>-1</sup> h <sup>-1</sup> )    | $R^2$ | $\alpha$<br>(mg g <sup>-1</sup> h <sup>-1</sup> ) | $\beta$<br>(g mg <sup>-1</sup> ) | $R^2$ |
| CeFe-CM-T                      | 14.03 ± 0.36                       | 2.55 × 10 <sup>-2</sup> ± 0.27 × 10 <sup>-2</sup> | 0.96  | 15.18 ± 0.28                        | 2.24 × 10 <sup>-3</sup> ± 0.23 × 10 <sup>-3</sup> | 0.99  | 1.81 ± 0.62                                       | 0.42 ± 0.04                      | 0.92  |
| CeO <sub>2</sub>               | 3.65 ± 0.08                        | 0.11 ± 0.01                                       | 0.75  | 3.82 ± 0.06                         | 5.02 × 10 <sup>-2</sup> ± 0.63 × 10 <sup>-2</sup> | 0.89  | 37.54 ± 25.06                                     | 2.75 ± 0.24                      | 0.85  |
| Fe <sub>3</sub> O <sub>4</sub> | 0.65 ± 0.03                        | 0.10 ± 0.02                                       | 0.48  | 0.70 ± 0.02                         | 0.22 ± 0.05                                       | 0.77  | 3.12 ± 1.48                                       | 13.63 ± 0.90                     | 0.93  |

<sup>1)</sup> The pseudo-first-order parameters ( $q_e$  and  $K_1$ ) were calculated using the logarithmic form of the equation  $q_t = q_e (1 - e^{(-K_1 t)})$ , where  $q_t$  is the amount sorbed per unit weight of sorbent at  $t$  time, mg g<sup>-1</sup>;  $t$  is the time, h;  $q_e$  (mg g<sup>-1</sup>) is the adsorption capacity coefficient at equilibrium time, and  $K_1$  (h<sup>-1</sup>) is the rate constant;  $R^2$  is the regression coefficient.

<sup>2)</sup> The pseudo-second-order parameters ( $q_e$  and  $K_2$ ) were calculated using the logarithmic form of the equation  $q_t = K_2 q_e^2 t / (1 + K_2 q_e t)$ , where  $q_t$  is the amount sorbed per unit weight of sorbent at  $t$  time, mg g<sup>-1</sup>;  $t$  is the time, h;  $q_e$  (mg g<sup>-1</sup>) is the adsorption capacity coefficient at equilibrium time, and  $K_2$  (mg g<sup>-1</sup> h<sup>-1</sup>) is the rate constant;  $R^2$  is the regression coefficient.

<sup>3)</sup> The Elovich parameters ( $\beta$  and  $\alpha$ ) were calculated using the logarithmic form of the equation  $q_t = (1/\beta) \ln(\beta \alpha) + (1/\beta) \ln(t)$ , where  $q_t$  is the amount sorbed per unit weight of sorbent at  $t$  time, mg g<sup>-1</sup>;  $t$  is the time, h;  $\beta$  (g mg<sup>-1</sup>) is the desorption constant, and  $\alpha$  (mg g<sup>-1</sup> h<sup>-1</sup>) is the initial adsorption rate.  $R^2$  is the regression coefficient.

**Table S3.** Regression Parameters of the Weber-Morris model

| Samples                        | $K_{i1}$<br>(mg/(g min <sup>0.5</sup> )) | $R^2$ | $K_{i2}$<br>(mg/(g min <sup>0.5</sup> )) | $R^2$ | $K_{i3}$<br>(mg/(g min <sup>0.5</sup> )) | $R^2$ |
|--------------------------------|------------------------------------------|-------|------------------------------------------|-------|------------------------------------------|-------|
| CeFe-CM-T                      | 1.5194 ± 0.0953                          | 0.99  | 0.3719 ± 0.0900                          | 0.94  | 0.0251 ± 0.0247                          | 0.26  |
| CeO <sub>2</sub>               | 0.2853 ± 0.0501                          | 0.84  | 0.1067 ± 0.0447                          | 0.59  | 0.0146 ± 0.0451                          | 0.72  |
| Fe <sub>3</sub> O <sub>4</sub> | 0.0231 ± 0.0034                          | 0.92  | 0.0194 ± 0.0019                          | 0.96  | 0.0134 ± 0.0019                          | 0.82  |

Weber Morris model:  $Q_t = k_i t^{0.5} + C$ ,  $Q_t$  is the amount sorbed per unit weight of sorbent at  $t$  time, mg/g;  $k_i$  is the diffusion rate constant during different stages, mg/g·min<sup>0.5</sup>;  $t$  is the time, min;  $C$  is a constant and  $R^2$  is the regression coefficient.

**Table S4.** Atomic rates of different states deconvoluted from O1s XPS spectrum of CeFe-CM-T before and after phosphate adsorption

| Samples     | O <sub>latt</sub> (%) | O <sub>surf</sub> (%) | Adsorbed H <sub>2</sub> O (%) |
|-------------|-----------------------|-----------------------|-------------------------------|
| CeFe-CM-T   | 77.40                 | 19.13                 | 3.47                          |
| CeFe-CM-T-P | 44.66                 | 34.58                 | 20.77                         |
